# Supplementary material for: A novel carbon/ZSM-5 nanocomposite membrane with high performance for oxygen/nitrogen separation
Source: Royal Society of Chemistry journal article supplement (doi:10.1039/b516519a), 2006-01-01
Supplement: b516519a.pdf [file b516519a.pdf]

## Supplementary Information

### A novel carbon/ZSM-5 nanocomposite membrane with high performance for oxygen/nitrogen separation.

Qingling Liu,<sup>a</sup> Tonghua Wang\*<sup>a</sup>, Jieshan Qiu\*<sup>a,b</sup> and Yiming Cao<sup>c</sup>

<sup>a</sup> State Key Lab of Fine Chemicals, Carbon Research Laboratory, School of Chemical Engineering, Dalian University of Technology, 158 Zhongshan Road, P.O. Box 49, Dalian 116012, China. Fax: +86-411-8899-3991; E-mail: wangth@chem.dlut.edu.cn, jqiu@dlut.edu.cn

<sup>b</sup> Key Laboratory for Micro/Nano Technology and System of Liaoning Province, Dalian University of Technology, Dalian 116023, China

<sup>c</sup> Dalian Institute of Chemical Physics, Chinese Academy of Sciences, Dalian 116023, China.

#### Thermogravimetric analysis (TGA)

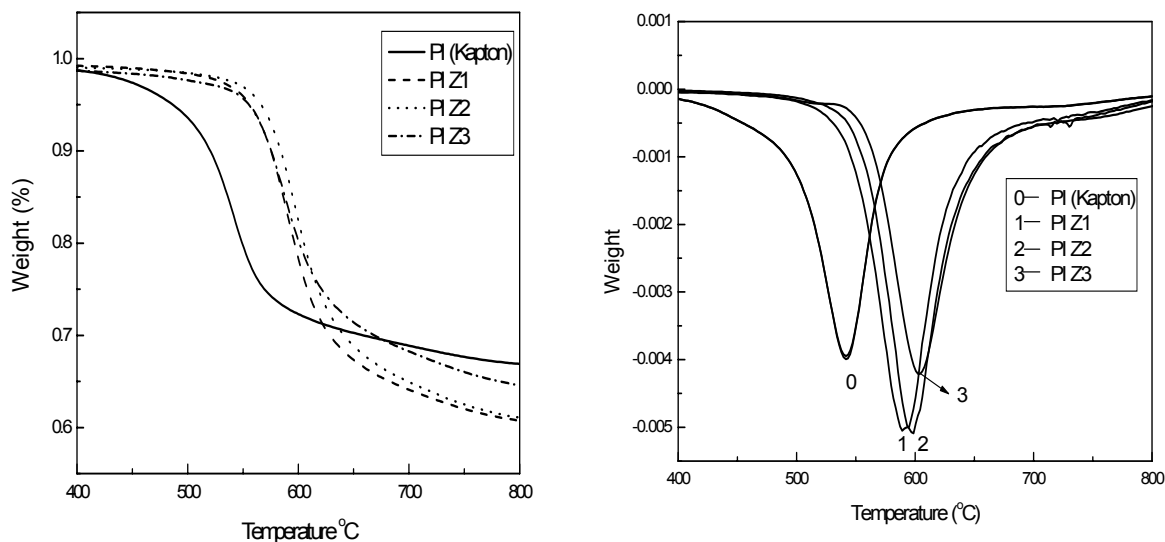

**Figure 1.** Thermogravimetric analysis (TGA) and differential TGA curves for PI membrane and PI/ZSM-5 composite membranes.

### Ramping profile for pyrolysis of precursor

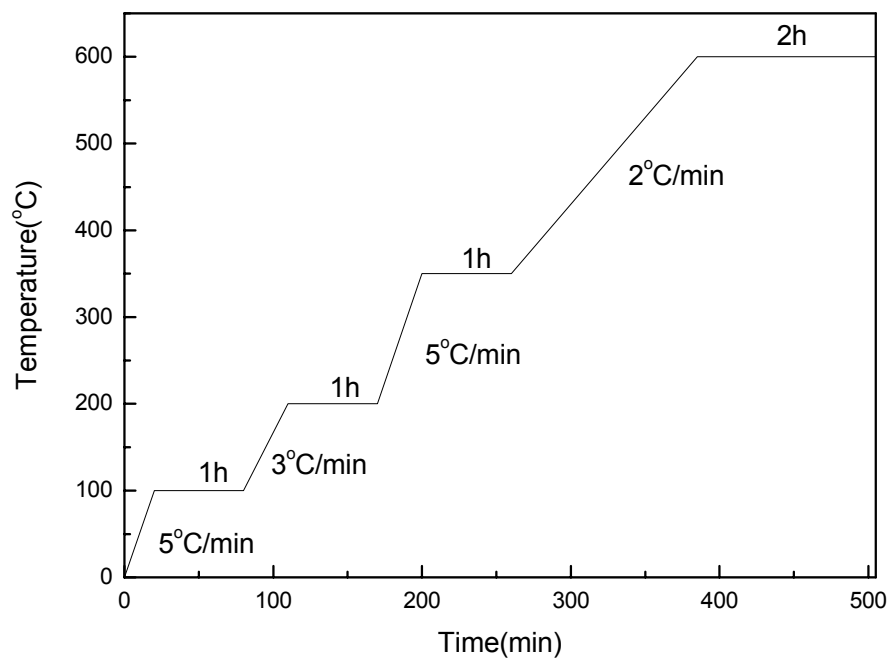

**Figure 2.** Ramping profile for pyrolysis of precursor.

### Nitrogen adsorption isotherms of pure nano-ZSM-5 at 77K

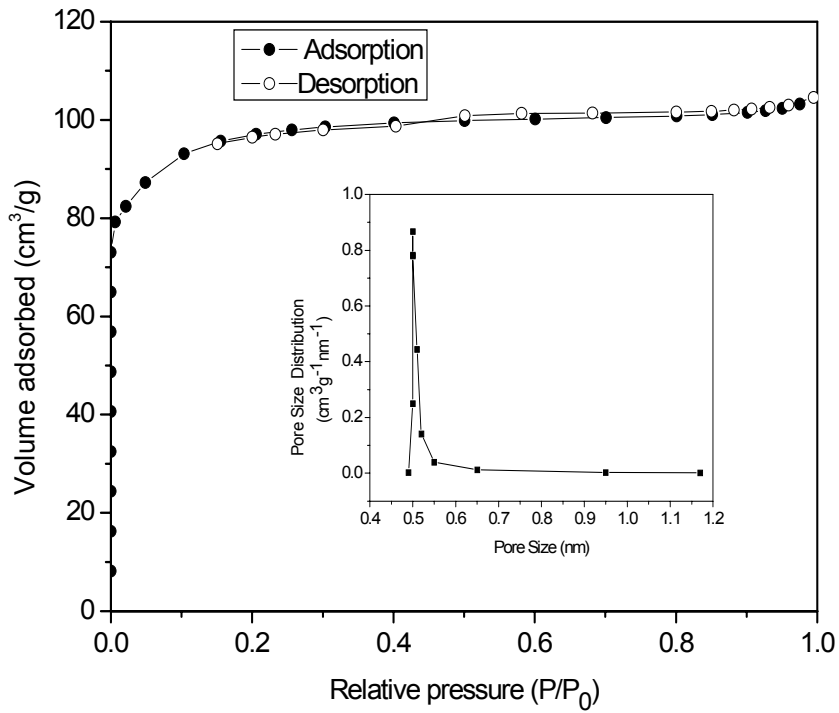

**Figure 3.** Nitrogen adsorption isotherms of pure nano-ZSM-5 at 77K
